# Supplementary material for: Loss of the Immunomodulatory Transcription Factor BATF2 in Humans Is Associated with a Neurological Phenotype
Source: MDPI journal article supplement (doi:10.3390/cells12020227), 2023-01-05
Supplement: s1 [file s1]

## **Supplementary Information**

### **Loss of the immunomodulatory transcription factor BATF2 in humans is associated with a neurological phenotype**

Gábor Zsurka, Maximilian Appel, Maximilian Nastaly, Kerstin Hallmann, Niels Hansen, Daniel Nass, Tobias Baumgartner, Rainer Surges, Gunther Hartmann, Eva Bartok, Wolfram S. Kunz

**Table S1**  
**Clinical and laboratory features of patients**

| Patient                                          | P1                                                                | P2                                                                                  | P3                                                              |
|--------------------------------------------------|-------------------------------------------------------------------|-------------------------------------------------------------------------------------|-----------------------------------------------------------------|
| <b>Gender</b>                                    | female                                                            | female                                                                              | female                                                          |
| <b>Current age</b>                               | 26                                                                | 23                                                                                  | 15                                                              |
| <b>Major clinical features at presentation</b>   | mental retardation, behavioral disorder with aggression, epilepsy | mental retardation, behavioral disorder with aggression and epilepsy, hyperactivity | severe mental retardation, epilepsy                             |
| <b>Minor clinical features at presentation</b>   | sleeping disorder                                                 | deformity of spine, sleeping disorder, gastroesophageal reflux                      | hyperflexible joints, pes equinus, small stature                |
| <b>Epilepsy onset</b>                            | 14                                                                | 14                                                                                  | 1.5                                                             |
| <b>Focal seizures</b>                            | yes (focal seizures with impaired awareness)                      | yes (focal seizures with impaired awareness)                                        | yes (focal seizures with impaired awareness)                    |
| <b>Gelastic seizures</b>                         | yes                                                               | yes                                                                                 | no                                                              |
| <b>Tonic clonic seizures</b>                     | yes (focal to bilateral tonic-clonic seizures)                    | yes (focal to bilateral tonic-clonic seizures)                                      | yes                                                             |
| <b>Tonic seizures</b>                            | no                                                                | no                                                                                  | yes                                                             |
| <b>Atonic seizures</b>                           | no                                                                | no                                                                                  | yes                                                             |
| <b>Current frequency of seizures per month</b>   | 2                                                                 | none                                                                                | 10                                                              |
| <b>Status epilepticus (age of onset)</b>         | yes (18)                                                          | no                                                                                  | yes (14)                                                        |
| <b>Febrile seizure (age of onset)</b>            | yes (1)                                                           | no                                                                                  | no                                                              |
| <b>Psychomotor retardation onset</b>             | 3                                                                 | 2.7                                                                                 | 1.5                                                             |
| <b>Neurological examination</b>                  | gait abnormality with outer rotation of hips and feet             | gait abnormality, ataxia                                                            | gait abnormality with spastic tetraparesis and ataxia           |
| <b>Psychopathological examination</b>            | aggressive, dysphoric behavior, moderate cognitive impairment     | aggressive, dysphoric behavior with echolalia, moderate cognitive impairment        | severe cognitive impairment, friendly nature                    |
| <b>Endocrinological status</b>                   | normal                                                            | normal                                                                              | precocious puberty                                              |
| <b>Hematological status</b>                      | thrombocytopenia                                                  | thrombocytopenia, mild leukopenia                                                   | thrombocytopenia, severe leukopenia, anemia                     |
| <b>Immunstatus PB</b>                            | normal                                                            | complete lack of B-cells                                                            | low natural killer cells                                        |
| <b>Infection status</b>                          | normal                                                            | normal                                                                              | frequent gastroenteritis and recurrent herpes labialis          |
| <b>Rheumatological and dermatological status</b> | Arthralgia                                                        | normal                                                                              | normal                                                          |
| <b>Autoantibodies PB</b>                         | anti-ANA (1:320), ANA subtypes were not identified                | borderline titre of anti-ANA (1:80)                                                 | no                                                              |
| <b>EEG</b>                                       | alpha-EEG with diffuse $\beta$ -activity                          | alpha-EEG                                                                           | diffuse slowing, multifocal generalized epileptiform discharges |
| <b>Cranial MRI</b>                               | no abnormalities                                                  | no abnormalities                                                                    | no abnormalities                                                |
| <b>CSF</b>                                       | normal                                                            | normal                                                                              | CSF protein elevated                                            |
| <b>Prior AED treatment</b>                       | BRV, CBZ, LCM, LEV, LTG, ESL                                      | CBZ, BRV, LCM, LTG, LEV                                                             | CBZ, LCM, LTG, LEV, PG                                          |
| <b>Current AED treatment</b>                     | ZNS, VPA                                                          | VPA, ZNS                                                                            | OXC, TPM, VPA, CLB                                              |

AED, antiepileptic drugs; ANA, antinuclear antibodies; BRV, brivaracetam; CBZ, carbamazepine; CLB, clobazam; ESL, eslicarbazepinacetat; LCM, lacosamide; LEV, levetiracetam; LTG, lamotrigine; OXC, oxcarbazepine; PB, peripheral blood; PG, pregabalin; TPM, topiramate; VPA, valproic acid

**Table S2****Common runs of homozygosity (ROH) and a single common homozygous deletion in the three patients**

| Run of homozygosity          | ROH size  | Deletion                     | Deletion size | Affected genes              |
|------------------------------|-----------|------------------------------|---------------|-----------------------------|
| chr2:198,085,516-202,074,931 | 3,989,416 |                              |               |                             |
| chr7:130,383,698-136,903,096 | 6,519,399 |                              |               |                             |
| chr11:46,434,794-56,319,084  | 9,884,291 | chr11: 55,603,479-55,651,839 | 48,361        | <i>OR4C11, OR4P4, OR4S2</i> |
| chr11:62,391,452-66,643,313  | 4,251,862 |                              |               |                             |
| chr11:67,289,638-71,789,537  | 4,499,900 |                              |               |                             |
| chr12:70,684,355-70,920,322  | 235,968   |                              |               |                             |
| chr17:1,083,502-2,962,525    | 1,879,024 |                              |               |                             |
| chr19:10,707,416-16,019,784  | 5,312,369 |                              |               |                             |

**Table S3****Rare homozygous variants detected in the three patients**

| Gene name      | Chromosomal position <sup>a</sup> | Transcript ID | Transcript change | Amino acid change | CADD score | Allele frequency in gnomAD | Parents' genotypes (mother; father) <sup>b</sup> |
|----------------|-----------------------------------|---------------|-------------------|-------------------|------------|----------------------------|--------------------------------------------------|
| <i>BATF2</i>   | 11:64994534G>A                    | NM_138456.3   | c.55C>T           | p.Gln19*          | 35         | 0                          | het; het                                         |
| <i>UNC93B1</i> | 11:67999231C>T                    | NM_030930.3   | c.629G>A          | p.Arg210Gln       | 22.8       | 5                          | het; het                                         |
| <i>EPOR</i>    | 19:11378451G>C                    | NM_000121.3   | c.1060C>G         | p.Pro354Ala       | 19.1       | 0                          | het; hom                                         |
| <i>ZNF709</i>  | 19:12466733C>T                    | NM_152601.3   | c.121G>A          | p.Ala41Thr        | 19.5       | 0                          | het; hom                                         |
| <i>CCDC105</i> | 19:15011213G>T                    | NM_173482.2   | c.388G>T          | p.Ala130Ser       | 22.9       | 45 (1 hom)                 | het; hom                                         |

<sup>a</sup>Chromosomal positions are indicated according to human genome assembly GRCh38.p12.

<sup>b</sup>het, heterozygous; hom, homozygous.

## Figure S1

### Knockout THP-1 cell lines generated using CRISPR–Cas9

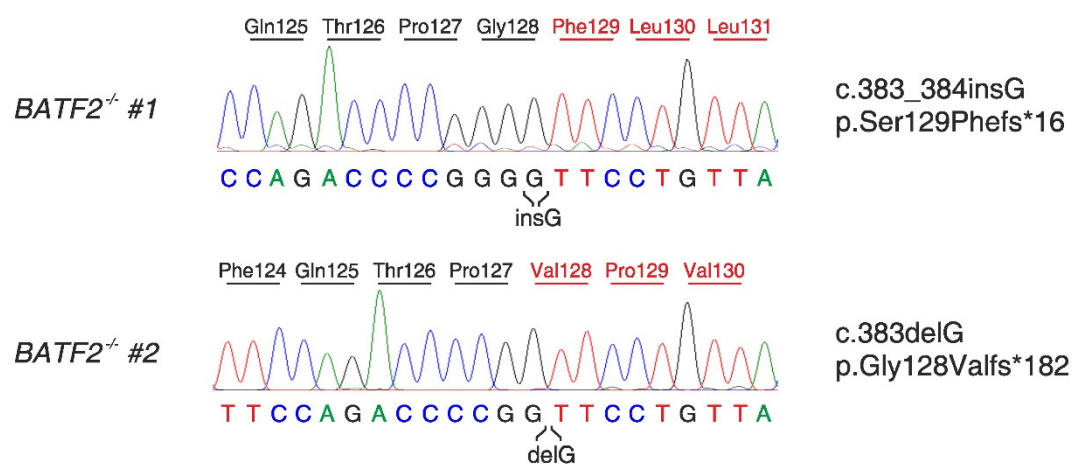

Sequencing chromatograms confirming knockout genotypes of *BATF2*. Red amino acid codes indicate missense changes downstream of frame shifts.

**Figure S2**

**Differentially expressed genes in non-stimulated *BATF2*<sup>-/-</sup> and wild-type THP-1 cells as determined by 3' RNA sequencing**

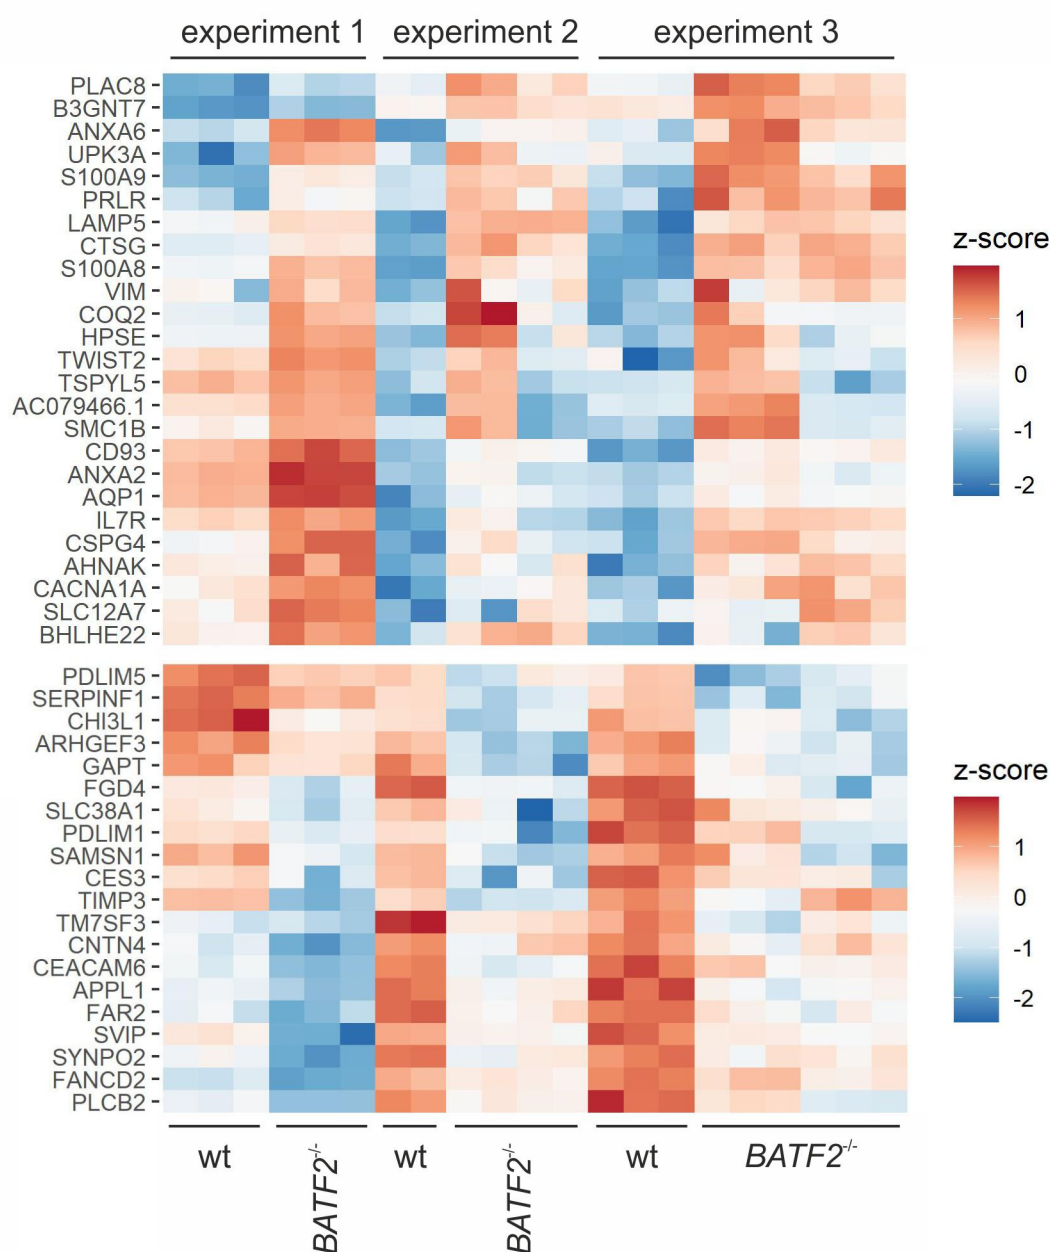

Heatmaps of z-scores of normalized gene counts. Genes are listed that show significant upregulation (upper panel) or downregulation (lower panel) in *BATF2*<sup>-/-</sup> THP-1 cells (FDR < 0.05) as compared to wild-type cells in all three independent experiment. Gene ontology pathway enrichment analysis does not return any significant hit.

### **Legend to Supplemental Video**

Video-EEG monitoring of patient P3. EEG: In the forerun (not shown in the video) non-rapid eye movement sleep (NREM, stage III). Initial generalized EEG suppression, followed by rhythmic theta activity predominantly right fronto-temporal. Semiology: Awakening, Staring, oral automatisms and mild hyperkinetic movements. Evaluation: Focal motor seizure. Awareness was not tested.
