# Supplementary material for: Loss of the Immunomodulatory Transcription Factor BATF2 in Humans Is Associated with a Neurological Phenotype
Source: Cells. 2023 Jan 5;12(2):227. doi: 10.3390/cells12020227 (PMC9856319; doi:10.3390/cells12020227)
Supplement: Supplementary file 1 [file cells-12-00227-s001.zip]

Archive with 5 entries (5 files):
- BATF2_Supplement_clean.pdf
- File S1.xlsx
- File S2.xlsx
- File S3.xlsx
- Video-EEG monitoring of patient P3.mp4
