# Supplementary material for: Loss of the Immunomodulatory Transcription Factor BATF2 in Humans Is Associated with a Neurological Phenotype
Source: Cells. 2023 Jan 5;12(2):227. doi: 10.3390/cells12020227 (PMC9856319; doi:10.3390/cells12020227)
Supplement: Supplementary file 1 [file cells-12-00227-s001.zip › File S1.xlsx]

## Sheet: Tabelle1
# _1st: 2019
# _2nd: 2021
# _sex: since both parents were compared two exclusively female siblings, we excluded sex-specific genes as defined by PValue < 0.01 father versus mother
NCBI_GeneID	hgnc_symbol	FC_1st	logFC_1st	logCPM_1st	F_1st	PValue_1st	FDR_1st	dtest_1st	FC_2nd	logFC_2nd	logCPM_2nd	F_2nd	PValue_2nd	FDR_2nd	dtest_2nd	FC_sex	logFC_sex	logCPM_sex	F_sex	PValue_sex	FDR_sex	dtest_sex		firstORsec
55601	DDX60	1.26289	0.336731	3.65139	0.779331	0.377347	1	0	15.8839	3.98949	6.66435	40.1146	2.40058e-10	2.86077e-06	1	0.577976	-0.790919	3.97573	0.534462	0.464738	1	0		1
91543	RSAD2	4.18176	2.06411	4.44051	32.0987	1.46757e-08	9.7161e-05	1	3.64895	1.86748	7.68393	15.4856	8.31682e-05	0.0660743	0	0.21681	-2.2055	4.84533	6.59434	0.0102316	1	0		1
10398	MYL9	0.263499	-1.92413	3.80215	26.8789	2.16846e-07	0.000760044	-1	0.298461	-1.74439	5.64222	7.41038	0.0064855	0.854952	0	0.331431	-1.59322	5.63574	4.72634	0.0297059	1	0		-1
4900	NRGN	0.356896	-1.48642	6.86044	24.8561	6.18295e-07	0.00193901	-1	0.435398	-1.19959	7.34194	7.10149	0.00770269	0.930963	0	0.414375	-1.27099	8.13406	3.9631	0.0465102	1	0		-1
6229	RPS24	1.19652	0.25884	6.54678	0.729881	0.392923	1	0	6.16207	2.62342	8.43449	31.4129	2.08893e-08	0.000124469	1	1.1581	0.211759	6.90087	0.10712	0.743447	1	0		1
51669	SARAF	1.01056	0.0151539	5.91251	0.00248896	0.960211	1	0	6.70011	2.74418	7.75749	30.715	2.99266e-08	0.000148598	1	1.27592	0.351536	6.37064	0.278096	0.597953	1	0		1
23741	EID1	1.13235	0.179321	4.83296	0.313783	0.575369	1	0	12.3044	3.62111	6.32181	29.9959	4.33536e-08	0.000184516	1	0.983164	-0.0244959	5.08859	0.000992135	0.974872	1	0		1
10346	TRIM22	1.1889	0.249628	4.00423	0.491027	0.48347	1	0	10.6986	3.41935	6.26684	26.8902	2.15582e-07	0.000856364	1	1.00508	0.00731223	4.33313	6.07015e-05	0.993784	1	0		1
9748	SLK	1.24155	0.312144	4.716	0.925432	0.336054	1	0	8.94355	3.16085	6.36997	24.9461	5.90096e-07	0.00212711	1	1.3207	0.401306	4.95275	0.252437	0.615365	1	0		1
10964	IFI44L	3.02145	1.59524	4.96748	22.6172	1.97856e-06	0.00561394	1	7.35701	2.87912	9.0691	38.8953	4.48145e-10	3.84594e-06	1	0.395918	-1.33673	5.47491	3.25337	0.0712795	1	0		2
4940	OAS3	1.95235	0.965212	4.26788	7.53112	0.00606483	1	0	4.85934	2.28076	7.4672	21.044	4.49164e-06	0.00922877	1	0.369602	-1.43596	4.80481	2.89245	0.0889981	1	0		1
51191	HERC5	2.63826	1.39959	5.0776	18.0422	2.16169e-05	0.0460015	1	3.63802	1.86315	7.9382	16.216	5.65392e-05	0.0543369	0	0.459672	-1.12132	5.4517	2.29254	0.13	1	0		1
NA	AC116533.1	2.55541	1.35355	0.188403	0.836182	0.360492	1	0	4.98685	2.31813	7.90755	23.7844	1.07847e-06	0.00338213	1	0.184084	-2.44157	4.20504	5.36131	0.02059	1	0		1
2803	GOLGA4	1.04124	0.0583052	5.5702	0.0362072	0.849088	1	0	6.11433	2.61219	6.90238	23.015	1.60873e-06	0.00456458	1	0.918252	-0.123037	5.95841	0.0320403	0.85794	1	0		1
3434	IFIT1	1.71049	0.774413	4.38684	5.09456	0.0240023	1	0	4.71313	2.23669	7.09716	18.6528	1.56898e-05	0.0225966	1	0.42616	-1.23053	4.8101	2.15504	0.142105	1	0		1
3956	LGALS1	0.888922	-0.169872	5.29805	0.305207	0.580637	1	0	0.24894	-2.00613	7.91856	22.0834	2.61251e-06	0.0064861	-1	0.813644	-0.29753	7.29711	0.217725	0.64078	1	0		-1
115352	FCRL3	1.37379	0.458159	2.92331	1.03611	0.308729	1	0	46.9657	5.55354	5.03448	21.8167	3.00194e-06	0.00715483	1	1.37609	0.46058	3.01492	0.0772114	0.781113	1	0		1
6232	RPS27	3.69115	1.88407	4.70751	29.3261	6.12453e-08	0.000280716	1	1.84406	0.882885	8.97926	4.44258	0.0350547	1	0	1.71139	0.775165	6.5572	1.36476	0.242717	1	0		1
6201	RPS7	1.81157	0.857244	2.86037	3.38222	0.065905	1	0	8.78128	3.13443	5.94377	20.3225	6.54688e-06	0.0128838	1	1.39769	0.483049	3.15443	0.0966386	0.755902	1	0		1
7114	TMSB4X	2.42666	1.27897	4.27318	12.8899	0.000330443	0.437543	0	3.64716	1.86677	9.31029	18.4548	1.74076e-05	0.0229444	1	0.60427	-0.726735	6.18441	1.14561	0.284472	1	0		1
100996286	LINC02273	1.4174	0.503245	2.25824	0.830356	0.362171	1	0	43.4655	5.4418	4.93262	19.4831	1.01551e-05	0.0177968	1	1.42568	0.511654	2.4073	0.0524523	0.81885	1	0		1
23253	ANKRD12	1.01623	0.0232204	6.68969	0.00595016	0.938514	1	0	4.05537	2.01983	8.12374	19.1954	1.18065e-05	0.0195413	1	1.10687	0.146491	7.179	0.0525256	0.818726	1	0		1
3604	TNFRSF9	0.353001	-1.50225	1.33814	3.6595	0.0557519	1	0	0.0330017	-4.92132	4.59442	18.7408	1.49829e-05	0.0223189	-1	1.65824	0.729649	4.19506	0.531817	0.465846	1	0		-1
6160	RPL31	1.57113	0.651803	5.90888	4.44362	0.0350332	1	0	4.58435	2.19672	8.32042	22.8088	1.79086e-06	0.00485037	1	1.47247	0.558238	6.28577	0.690233	0.406087	1	0		1
7178	TPT1	1.12067	0.164366	8.87987	0.27387	0.600748	1	0	3.60504	1.85002	11.1231	18.4216	1.77132e-05	0.0229444	1	1.25965	0.333027	9.51324	0.270691	0.60287	1	0		1
653784	MZT2A	1.51957	0.603659	3.06619	1.91286	0.166648	1	0	6.82948	2.77178	6.1195	18.1173	2.07811e-05	0.0258032	1	1.80457	0.851656	3.55053	0.43008	0.511951	1	0		1
54855	TENT5C	1.41957	0.505458	4.85786	2.4469	0.117759	1	0	4.28072	2.09785	7.45497	18.1168	2.07863e-05	0.0258032	1	0.894176	-0.161369	5.39301	0.0477907	0.826953	1	0		1
4939	OAS2	1.33478	0.416601	4.19305	1.43251	0.231357	1	0	4.40084	2.13778	7.26084	17.9252	2.29879e-05	0.0273947	1	0.545716	-0.873779	4.93694	1.1736	0.278666	1	0		1
222487	ADGRG3	0.676089	-0.564714	3.50164	2.1393	0.143569	1	0	0.213043	-2.23078	6.41836	17.6898	2.60139e-05	0.0303929	-1	1.78401	0.835125	5.80455	1.40012	0.236706	1	0		-1
6164	RPL34	1.558	0.639696	6.16864	4.32186	0.0376271	1	0	7.52047	2.91082	7.83112	34.4095	4.47325e-09	3.33174e-05	1	1.38037	0.46505	6.2346	0.477163	0.489712	1	0		1
3848	KRT1	1.71747	0.780284	5.43893	6.13333	0.0132666	1	0	4.22534	2.07907	8.14886	20.2609	6.76098e-06	0.0128838	1	1.39038	0.475474	5.89982	0.469212	0.493351	1	0		1
3575	IL7R	1.15813	0.211794	8.03078	0.474446	0.49095	1	0	3.37399	1.75445	9.60855	16.6589	4.47595e-05	0.0459131	1	1.58089	0.660737	8.49583	1.0957	0.295214	1	0		1
9636	ISG15	2.76396	1.46674	4.67797	18.4217	1.77127e-05	0.0390894	1	2.44812	1.29168	7.59736	7.70743	0.00549997	0.785063	0	0.716979	-0.479997	5.33422	0.411868	0.521024	1	0		1
94240	EPSTI1	2.30248	1.20319	4.18559	11.1806	0.00082675	0.849343	0	6.35916	2.66884	6.62324	21.2123	4.11406e-06	0.00875486	1	0.706557	-0.501123	4.19103	0.253887	0.614352	1	0		1
3429	IFI27	19.2752	4.26868	1.60875	20.2424	6.82674e-06	0.0156451	1	104.171	6.70281	6.13727	55.9741	7.37674e-14	2.19771e-09	1	0.222715	-2.16673	0.373831	0.241021	0.623471	1	0		2
219285	SAMD9L	1.6574	0.728922	4.75868	4.94884	0.0261094	1	0	5.52412	2.46574	7.61948	24.8921	6.06878e-07	0.00212711	1	1.25436	0.326948	5.18104	0.181771	0.669857	1	0		1
1843	DUSP1	3.77866	1.91788	4.8035	30.5039	3.33661e-08	0.000165676	1	31.8967	4.99533	4.51869	11.9236	0.000554389	0.229398	0	0.948005	-0.0770332	3.72723	0.00424048	0.948079	1	0		1
4938	OAS1	1.95486	0.967064	3.74481	6.3664	0.011631	1	0	13.1238	3.71412	6.82959	38.8794	4.51818e-10	3.84594e-06	1	0.990039	-0.0144427	3.79762	0.000156345	0.990024	1	0		1
81027	TUBB1	0.305613	-1.71022	4.74956	28.2824	1.0497e-07	0.000416977	-1	0.678096	-0.560439	7.40285	1.56083	0.211545	1	0	0.620092	-0.689447	6.71016	1.10258	0.293702	1	0		-1
5577	PRKAR2B	0.37404	-1.41874	5.02086	20.6643	5.47625e-06	0.0130521	-1	0.773446	-0.370627	6.66095	0.545197	0.460288	1	0	0.462991	-1.11094	6.47797	2.74964	0.097279	1	0		-1
3690	ITGB3	0.258471	-1.95193	3.83599	27.9461	1.24891e-07	0.0004651	-1	0.818032	-0.289771	6.3312	0.289199	0.590735	1	0	0.888178	-0.171079	5.69106	0.058142	0.809457	1	0		-1
2353	FOS	3.99095	1.99673	4.46838	30.526	3.29875e-08	0.000165676	1	1.43597	0.52203	3.46454	0.0789559	0.778718	1	0	1.21704	0.283371	3.5643	0.0490632	0.824702	1	0		1
