# Supplementary material for: Loss of the Immunomodulatory Transcription Factor BATF2 in Humans Is Associated with a Neurological Phenotype
Source: Cells. 2023 Jan 5;12(2):227. doi: 10.3390/cells12020227 (PMC9856319; doi:10.3390/cells12020227)
Supplement: Supplementary file 1 [file cells-12-00227-s001.zip › File S2.xlsx]

## Sheet: Tabelle1
# dtest: 1 = upregulation after stimulation (FDR < 0.05)
# FCrate: fold-change in BATF2-/- versus wild-type THP-1 cells
# exp: 1 = significant upregulation in BATF2-/- cells that is more than 2 -fold as compared to wild-type THP-1 cells
NCBI_GeneID	hgnc_symbol	FDR_wt1	dtest_wt1	FDR_bf1	dtest_bf1	FCrate_bf1	FDR_wt2	dtest_wt2	FDR_bf2	dtest_bf2	FCrate_bf2	FDR_wt3	dtest_wt3	FDR_bf3	dtest_bf3	FCrate_bf3	FCrate_av	FCrate_sd	FCrate_cv	exp1	exp2	exp3	hits
3627	CXCL10	0	1	0	1	1.03009	3.41476e-06	1	0	1	5.3119	1.81615e-24	1	5.1765e-23	1	2.96253	3.10151	2.14429	0.69137		1	1	2
6373	CXCL11	7.4497e-292	1	1.27442e-297	1	8.63641	0.000179008	1	0	1	6.52365	6.3952e-07	1	4.67536e-15	1	0.959343	5.37314	3.96574	0.738068	1	1		2
3437	IFIT3	0	1	3.04191e-241	1	2.23093	4.85437e-06	1	9.32777e-289	1	6.32997	2.27282e-27	1	1.6956e-21	1	2.36825	3.64305	2.32796	0.639013	1	1	1	3
2633	GBP1	3.76629e-141	1	1.10994e-212	1	8.3657	0.00327459	1	3.77022e-221	1	26.12	1.52625e-08	1	2.8223e-13	1	0.971745	11.8191	12.9249	1.09356	1	1		2
3434	IFIT1	0	1	2.83441e-195	1	1.30644	8.01481e-05	1	1.77023e-225	1	5.01072	1.17255e-09	1	6.69794e-20	1	4.0645	3.46056	1.92458	0.556147		1	1	2
10964	IFI44L	0	1	4.62232e-195	1	1.24114	2.8718e-06	1	3.81458e-244	1	0.838484	8.12241e-56	1	1.73638e-25	1	2.37173	1.48378	0.794902	0.535726			1	1
3433	IFIT2	3.08309e-240	1	1.20594e-185	1	3.33629	0.000317131	1	4.21013e-175	1	5.54279	2.93738e-09	1	1.20492e-12	1	1.72315	3.53408	1.91749	0.542571	1	1		2
91543	RSAD2	4.66327e-165	1	9.01941e-176	1	6.27383	0.0299942	1	6.62145e-102	1	8.76745	0.37427	0	6.25439e-10	1	3.21243	6.08457	2.78234	0.457278	1	1	1	3
4600	MX2	0	1	2.50984e-165	1	1.83718	3.11151e-06	1	2.96574e-202	1	3.41313	1.72039e-27	1	1.29255e-21	1	2.74908	2.66646	0.79122	0.29673		1	1	2
388372	CCL4L2	9.48213e-211	1	2.63523e-163	1	1.31954	8.86566e-05	1	2.52673e-195	1	4.17698	2.44753e-112	1	2.94058e-24	1	0.191148	1.89589	2.05447	1.08364		1		1
6351	CCL4	5.06523e-203	1	5.05309e-162	1	1.38403	0.000139929	1	2.16486e-194	1	4.76402	1.65028e-114	1	2.35485e-25	1	1.26324	2.47043	1.98722	0.804405		1		1
10410	IFITM3	7.8779e-212	1	2.11723e-157	1	8.44218	4.70993e-05	1	7.55926e-154	1	2.21672	1.15735e-34	1	6.1045e-12	1	1.75347	4.13746	3.73519	0.902774	1	1		2
129607	CMPK2	1.54204757172398e-312	1	5.34067e-147	1	2.55367	4.51007e-06	1	1.98516e-165	1	3.40059	5.88599e-16	1	3.22563e-18	1	2.487	2.81376	0.509303	0.181005	1	1	1	3
9636	ISG15	3.03044782202455e-312	1	2.54732e-146	1	2.61285	9.94259e-07	1	1.36188e-208	1	3.36193	3.10545e-64	1	2.35485e-25	1	2.21774	2.73084	0.581153	0.212811	1	1	1	3
8743	TNFSF10	3.99946e-126	1	1.46343e-140	1	5.19781	0.0181321	1	1.69295e-111	1	5.58629	1	0	3.01525e-08	1	2.76356	4.51589	1.52994	0.338791	1	1	1	3
3429	IFI27	6.46915e-97	1	2.57506e-138	1	2.47831	0.000295856	1	1.52363e-194	1	0.930492	5.87381e-18	1	1.17851e-18	1	1.91121	1.77334	0.783064	0.441577	1			1
8638	OASL	1.47712e-221	1	1.17104e-136	1	1.51331	0.000505289	1	8.76631e-94	1	2.51311	2.64955e-08	1	6.50837e-11	1	1.92346	1.98329	0.50258	0.253407		1		1
414062	CCL3L3	1.37994e-134	1	9.04264e-136	1	3.45877	8.44419e-05	1	7.96993e-143	1	3.75505	4.12231e-116	1	3.92311e-26	1	0.4656	2.55981	1.81968	0.710865	1	1		2
11274	USP18	2.3382e-107	1	3.15034e-133	1	5.03981	6.94057e-06	1	7.40677e-154	1	3.00764	3.50859e-24	1	3.45552e-18	1	1.75723	3.26823	1.65673	0.50692	1	1		2
57823	SLAMF7	3.17789e-166	1	5.33403e-122	1	1.73822	0.000113348	1	3.14065e-129	1	1.95722	7.54075e-45	1	5.67544e-18	1	2.13284	1.94276	0.197707	0.101766			1	1
115361	GBP4	2.97013e-75	1	1.26332e-119	1	4.34008	0.000631255	1	5.65129e-119	1	4.83854	0.00156869	1	2.51899e-11	1	2.83077	4.00313	1.04544	0.261155	1	1	1	3
259307	IL4I1	8.7554e-305	1	5.53601e-117	1	1.5328	5.17941e-05	1	2.1569e-193	1	4.50659	3.3877e-60	1	7.72219e-21	1	0.947805	2.32906	1.90834	0.819361		1		1
94240	EPSTI1	5.08122e-134	1	6.77002e-112	1	1.63853	0.00039675	1	4.98623e-136	1	5.22891	3.04168e-07	1	3.16703e-12	1	1.78586	2.88443	2.03171	0.704372		1		1
85441	HELZ2	3.53798e-292	1	1.81083e-110	1	1.76474	4.22352e-06	1	4.79908e-161	1	2.56175	2.26275e-27	1	3.0427e-16	1	1.35247	1.89299	0.614758	0.324756		1		1
9935	MAFB	4.97976e-147	1	3.29616e-110	1	2.92691	5.61108e-05	1	2.81312e-209	1	12.9746	9.15479e-71	1	3.52644e-17	1	1.28416	5.72856	6.32878	1.10478	1	1		2
3428	IFI16	1.7637e-246	1	5.9018e-110	1	1.89626	1.46974e-06	1	2.56009e-184	1	2.7302	9.4415e-39	1	1.05436e-19	1	1.9699	2.19879	0.461689	0.209974		1		1
4283	CXCL9	9.98717e-23	1	2.93714e-107	1	11.4709	0.527731	0	2.35233e-33	1	4.44252	1	0	0.00547126	1	3.29735	6.4036	4.42563	0.691116	1	1	1	3
64135	IFIH1	4.34885e-160	1	2.42094e-106	1	2.59779	4.10305e-05	1	6.09589e-137	1	2.9609	5.26836e-13	1	3.31971e-15	1	2.0356	2.53143	0.466206	0.184167	1	1	1	3
9447	AIM2	3.50524e-27	1	1.81648e-105	1	1.70582	0.30322	0	1.43996e-53	1	5.55474	0.174406	0	7.73469e-06	1	1.09246	2.78434	2.41876	0.868701		1		1
3669	ISG20	2.42627e-91	1	1.29402e-104	1	2.42877	0.0224984	1	6.58666e-93	1	6.98643	0.000761349	1	9.14011e-10	1	1.49243	3.63588	2.93919	0.808385	1	1		2
54625	PARP14	4.66036e-265	1	3.2867e-104	1	2.08287	7.13702e-07	1	1.9791e-141	1	1.99934	5.60112e-28	1	5.07067e-19	1	1.94997	2.01073	0.067176	0.0334088	1			1
10346	TRIM22	5.60671e-152	1	5.03061e-99	1	1.39427	0.000679994	1	2.6209e-116	1	5.35497	2.28349e-14	1	1.54132e-15	1	1.01982	2.58969	2.40211	0.927568		1		1
91624	NEXN	6.55089e-142	1	1.17986e-97	1	3.18932	3.33656e-06	1	1.42207e-144	1	3.86555	0.00670991	1	8.72969e-13	1	2.92414	3.32634	0.485431	0.145936	1	1	1	3
6347	CCL2	1.8997e-120	1	5.85785e-97	1	2.9018	0.00152487	1	5.31929e-197	1	6.85147	2.04538e-74	1	2.06079e-12	1	5.09248	4.94858	1.97876	0.399865	1	1	1	3
6614	SIGLEC1	2.3903e-82	1	1.86504e-94	1	2.33273	2.63066e-05	1	7.5119e-96	1	0.606038	1.46861e-40	1	1.91114e-21	1	0.82601	1.25493	0.939862	0.748939	1			1
6648	SOD2	2.62607e-247	1	2.97048e-92	1	1.77797	0.00529807	1	3.71392e-52	1	2.77119	5.78838e-24	1	2.19493e-10	1	1.16371	1.90429	0.811149	0.425958		1		1
3553	IL1B	0	1	1.38756e-91	1	0.889534	8.60524e-06	1	6.67497e-161	1	2.98305	1.22596e-137	1	6.04191e-23	1	1.18319	1.68526	1.13347	0.67258		1		1
54809	SAMD9	1.54513e-143	1	2.06578e-91	1	2.52669	0.000218718	1	7.05263e-107	1	3.24804	0.000584928	1	4.48732e-13	1	2.63907	2.8046	0.388121	0.138387	1	1	1	3
958	CD40	6.87565e-162	1	8.47988e-86	1	1.24479	0.00106879	1	4.49825e-67	1	4.74781	1.81251e-06	1	8.64541e-07	1	1.0418	2.3448	2.08354	0.888578		1		1
3557	IL1RN	5.55591e-91	1	8.78099e-83	1	3.60407	3.66841e-05	1	8.67658e-155	1	3.11345	6.01563e-31	1	2.16174e-19	1	1.7251	2.8142	0.974572	0.346305	1	1		2
116071	BATF2	9.46002e-66	1	1.05782e-82	1	5.14727	0.00729153	1	3.26426e-50	1	47.338	0.844914	0	0.0246206	1	1.93859	18.1413	25.336	1.39659	1	1		2
51191	HERC5	1.03993e-116	1	3.91406e-81	1	2.04561	0.0137985	1	7.94021e-81	1	5.23203	0.353235	0	6.59473e-10	1	2.36925	3.21563	1.75373	0.545378	1	1	1	3
3665	IRF7	5.66269e-186	1	5.32887e-79	1	1.44553	0.000169594	1	8.18482e-121	1	2.29572	2.81161e-20	1	1.40854e-13	1	2.03065	1.92397	0.435019	0.226105		1	1	2
10561	IFI44	1.4623e-112	1	7.11878e-78	1	1.11211	0.00108083	1	1.10396e-110	1	3.2799	3.90051e-12	1	2.0783e-18	1	1.50001	1.96401	1.15598	0.588584		1		1
83666	PARP9	3.51489e-194	1	1.84133e-77	1	1.18554	1.05624e-05	1	1.98368e-151	1	2.93829	9.44772e-20	1	3.22563e-18	1	1.9941	2.03931	0.877247	0.430168		1		1
3431	SP110	2.69886e-223	1	1.39104e-76	1	1.59853	1.46974e-06	1	4.86534e-126	1	2.23948	5.26577e-17	1	4.20208e-17	1	1.95031	1.92944	0.320984	0.166361		1		1
2634	GBP2	3.7911e-97	1	1.16587e-75	1	2.58805	1.47926e-05	1	3.95678e-125	1	2.37115	5.45186e-23	1	9.32716e-15	1	1.24315	2.06745	0.722057	0.34925	1	1		2
79931	TNIP3	1.19908e-42	1	1.4354e-73	1	0.203076	0.0658205	0	1.51454e-14	1	2.41013	1.64176e-07	1	0.0143837	1	0.610272	1.07449	1.17448	1.09305		1		1
57674	RNF213	1.06488e-109	1	5.3274e-70	1	2.32847	4.10305e-05	1	8.56654e-66	1	2.00939	4.36762e-08	1	6.55574e-12	1	1.51154	1.9498	0.411711	0.211155	1	1		2
9246	UBE2L6	1.58045e-126	1	9.3215e-70	1	1.84663	0.000455905	1	3.23263e-133	1	7.90081	3.63071e-05	1	1.06729e-11	1	2.74274	4.1634	3.26756	0.784831		1	1	2
24138	IFIT5	1.60465e-141	1	1.35639e-69	1	0.905837	0.00410793	1	2.23394e-97	1	5.81943	0.199254	0	3.50602e-07	1	2.57055	3.0986	2.499	0.806491		1	1	2
597	BCL2A1	4.66917e-93	1	1.75233e-69	1	2.29944	0.00524265	1	6.30018e-95	1	24.5538	1.01907e-29	1	6.73347e-12	1	0.751183	9.20148	13.318	1.44738	1	1		2
3575	IL7R	4.96426e-39	1	1.18899e-68	1	4.08921	7.62249e-06	1	5.85794e-103	1	1.76331	2.97878e-59	1	2.63593e-14	1	0.440817	2.09778	1.84705	0.88048	1			1
26228	STAP1	1.85299e-21	1	4.01209e-67	1	5.00543	0.300799	0	3.10714e-24	1	3.73474	1	0	0.0440054	1	1.83551	3.52523	1.59531	0.452542	1	1		2
5079	PAX5	2.30063e-28	1	1.49952e-65	1	3.82719	0.211367	0	2.28332e-50	1	7.06348	0.22537	0	0.0381371	1	1.06371	3.98479	3.00299	0.753613	1	1		2
115362	GBP5	9.32367e-35	1	2.41319e-65	1	3.42281	0.00956714	1	3.80494e-50	1	4.0503	1.39396e-10	1	1.9189e-14	1	0.241731	2.57162	2.04199	0.794048	1	1		2
1026	CDKN1A	1.06335e-47	1	9.36747e-64	1	3.39479	0.00188105	1	1.87042e-50	1	2.6651	1.93562e-16	1	4.18308e-15	1	1.70893	2.58961	0.845463	0.326483	1	1		2
6773	STAT2	3.22089e-83	1	1.75802e-63	1	2.33413	0.00216283	1	2.31042e-59	1	2.78132	0.00287514	1	2.94931e-11	1	1.99742	2.37096	0.393245	0.165859	1	1		2
4061	LY6E	7.95626e-61	1	5.09943e-62	1	2.03559	0.0135067	1	2.49204e-76	1	4.42653	8.88907e-05	1	4.18308e-15	1	2.65177	3.03796	1.24137	0.40862	1	1	1	3
5359	PLSCR1	5.18373e-101	1	7.21839e-62	1	1.90967	0.000112063	1	1.63542e-97	1	3.62924	1.25556e-18	1	7.6909e-16	1	1.58633	2.37508	1.0981	0.462342		1		1
7453	WARS1	1.46256e-28	1	1.98983e-58	1	3.91656	0.137338	0	2.58675e-45	1	3.46744	0.000132091	1	0.000468955	1	1.0873	2.82376	1.5205	0.538464	1	1		2
91351	DDX60L	3.82174e-64	1	9.12158e-57	1	2.75282	0.000631255	1	8.1495e-68	1	2.76759	0.000164516	1	9.49404e-11	1	1.86055	2.46032	0.519469	0.211139	1	1		2
55601	DDX60	7.99107e-60	1	3.76886e-56	1	2.38475	0.000307487	1	4.23133e-65	1	2.22741	2.21758e-08	1	7.3196e-12	1	1.43093	2.01436	0.511354	0.253854	1	1		2
64651	CSRNP1	7.39711e-67	1	3.86708e-56	1	2.11628	0.0108009	1	5.04285e-59	1	6.59465	3.25513e-07	1	3.79751e-07	1	1.05476	3.25523	2.94032	0.903261	1	1		2
5610	EIF2AK2	2.4769e-208	1	6.65209e-56	1	1.15223	4.85437e-06	1	1.35002e-86	1	2.16599	8.46824e-19	1	3.41474e-13	1	1.44405	1.58743	0.521867	0.32875		1		1
5371	PML	1.19987e-77	1	1.51663e-55	1	2.19082	0.00192935	1	5.89469e-46	1	2.1147	3	0	1.83113e-08	1	2.41213	2.23922	0.15451	0.0690016	1	1	1	3
55008	HERC6	1.4847e-41	1	9.9276e-55	1	2.11324	0.0520085	0	3.5043e-19	1	2.1403	0.583237	0	0.00152668	1	1.36931	1.87429	0.437529	0.233437	1	1		2
152926	PPM1K	1.79993e-57	1	1.07649e-54	1	2.25154	0.0954338	0	3.27694e-21	1	2.17016	1	0	0.00204027	1	1.76297	2.06155	0.261767	0.126976	1	1		2
10135	NAMPT	6.15092e-41	1	2.17338e-54	1	3.09452	0.0470237	1	3.0802e-31	1	2.60343	8.90409e-10	1	2.2389e-08	1	1.0395	2.24582	1.07317	0.477853	1	1		2
57664	PLEKHA4	2.4743e-15	1	7.26395e-54	1	4.21232	0.00366	1	3.74952e-47	1	2.29181	0.00102728	1	4.16471e-05	1	1.13244	2.54552	1.55554	0.611087	1	1		2
79132	DHX58	1.14043e-59	1	3.70093e-53	1	1.67339	0.137183	0	1.02049e-49	1	5.38404	0.00474706	1	5.35731e-05	1	1.10696	2.72146	2.32319	0.853653		1		1
8542	APOL1	1.47919e-37	1	7.70513e-53	1	2.87856	0.0216801	1	1.3132e-52	1	3.48158	0.216898	0	4.50729e-06	1	1.629	2.66304	0.944906	0.354822	1	1		2
80830	APOL6	5.24182e-143	1	9.89981e-53	1	1.44298	0.000144276	1	1.69552e-96	1	3.11369	4.64199e-09	1	1.92063e-09	1	1.22575	1.92747	1.03302	0.535946		1		1
140691	TRIM69	1.11542e-64	1	3.74785e-52	1	1.63499	0.715088	0	5.89525e-12	1	2.42856	1	0	0.0274986	1	2.05329	2.03895	0.39698	0.194698		1	1	2
467	ATF3	2.19503e-21	1	1.02327e-51	1	4.50561	0.126537	0	1.27279e-16	1	1.64483	1	0	1.26481e-05	1	3.23912	3.12985	1.43352	0.458014	1		1	2
55337	SHFL	4.92644e-70	1	5.89074e-51	1	1.89116	0.00356569	1	3.95122e-45	1	2.46488	0.000618338	1	4.45803e-09	1	1.49205	1.94936	0.489022	0.250862		1		1
64761	PARP12	4.77501e-55	1	1.31812e-48	1	1.79748	0.0771105	0	9.43343e-48	1	4.78543	0.276866	0	2.7414e-07	1	1.77196	2.78496	1.73251	0.622095		1		1
3383	ICAM1	1.86483e-95	1	2.32649e-48	1	0.435984	0.000381111	1	9.56098e-38	1	2.65342	2.52674e-23	1	4.65127e-14	1	1.72981	1.6064	1.11386	0.693386		1		1
3659	IRF1	6.36902e-54	1	2.56173e-48	1	2.469	0.078844	0	1.06405e-44	1	3.37271	1	0	0.0382028	1	2.10406	2.64859	0.653116	0.24659	1	1	1	3
1236	CCR7	2.281e-12	1	7.7035e-48	1	3.3554	0.232142	0	1.74696e-08	1	2.10792	0.0215344	1	3.76952e-06	1	1.07864	2.18065	1.14012	0.522836	1	1		2
7130	TNFAIP6	1.35434e-42	1	8.54785e-47	1	2.7589	1	0	5.80508e-25	1	13.0761	4.45603e-05	1	1.01211e-05	1	1.07505	5.63668	6.49749	1.15272	1	1		2
1230	CCR1	8.74622e-40	1	2.4188e-46	1	2.7044	0.000618157	1	3.01246e-43	1	2.31304	0.0567223	0	6.29224e-10	1	2.12825	2.3819	0.294183	0.123508	1	1	1	3
135112	NCOA7	2.44548e-105	1	5.74524e-46	1	1.5518	0.0072456	1	1.90848e-45	1	2.17925	0.0025266	1	1.85257e-11	1	2.08479	1.93861	0.338299	0.174506		1	1	2
55332	DRAM1	2.47016e-43	1	5.44844e-44	1	2.1761	0.00181859	1	3.39033e-34	1	1.55755	1.33668e-08	1	1.88052e-09	1	1.26869	1.66745	0.463583	0.27802	1			1
51056	LAP3	2.16777e-41	1	6.32475e-43	1	2.26891	1.837e-05	1	4.93123e-48	1	1.36296	5.10252e-24	1	5.52242e-15	1	1.45564	1.69584	0.498456	0.293929	1			1
2643	GCH1	2.29857e-67	1	6.9692e-43	1	1.08359	1	0	7.37038e-39	1	7.81897	0.00355801	1	0.0317106	1	0.621807	3.17479	4.0286	1.26893		1		1
85363	TRIM5	2.61544e-31	1	1.04164e-42	1	2.39316	0.0325871	1	1.20586e-35	1	2.88374	0.00312115	1	4.37613e-05	1	1.07454	2.11715	0.93565	0.441939	1	1		2
3576	CXCL8	6.46283e-150	1	7.73882e-41	1	0.662487	0.137852	0	3.59199e-07	1	28.5416	5.34297e-39	1	2.4148e-09	1	0.433667	9.87926	16.1625	1.636		1		1
3430	IFI35	2.09207e-37	1	3.23188e-39	1	2.10202	0.00167037	1	9.31156e-62	1	3.33709	0.000120538	1	1.12922e-10	1	2.24378	2.56096	0.675871	0.263913	1	1	1	3
54877	ZCCHC2	5.6694e-33	1	1.92801e-37	1	2.29646	0.00946436	1	1.8279e-23	1	1.62842	0.00434769	1	1.19401e-05	1	1.24488	1.72326	0.532168	0.308815	1			1
5698	PSMB9	1.0145e-35	1	1.27205e-36	1	2.28685	0.00642701	1	5.13833e-52	1	2.68306	0.472307	0	2.07326e-07	1	1.73058	2.2335	0.478477	0.214228	1	1		2
64108	RTP4	2.00055e-39	1	1.41749e-36	1	1.75039	0.209175	0	4.61885e-30	1	3.62783	1	0	0.0323701	1	3.0612	2.81314	0.962989	0.342318		1	1	2
3593	IL12B	2.21768e-14	1	1.6039e-36	1	10.8902	0.0385263	1	2.32351e-32	1	14.86	2.10836e-09	1	3.81078e-11	1	1.64079	9.13032	6.78304	0.742914	1	1		2
57493	HEG1	3.17889e-09	1	5.89992e-35	1	3.14705	1	0	5.00427e-41	1	4.63761	0.00469285	1	2.90076e-06	1	1.32208	3.03558	1.66057	0.547037	1	1		2
9050	PSTPIP2	1.75836e-75	1	6.31688e-35	1	19.6139	0.00157319	1	2.12385e-55	1	1.50605	1.55866e-10	1	5.42359e-08	1	1.17307	7.43099	10.552	1.42	1			1
51284	TLR7	2.58946e-18	1	5.17913e-34	1	1.35186	0.0668279	0	9.80129e-48	1	9.48359	0.00273077	1	9.47337e-05	1	0.756974	3.86414	4.87567	1.26177		1		1
4582	MUC1	1.67608e-23	1	6.79282e-34	1	2.11522	0.0162438	1	8.58736e-26	1	2.04178	1.72808e-09	1	1.06729e-11	1	1.61036	1.92245	0.27276	0.141881	1	1		2
87178	PNPT1	4.07294e-33	1	1.34959e-33	1	2.18766	0.000498208	1	5.97782e-33	1	1.63512	0.000436137	1	6.40039e-08	1	1.43735	1.75337	0.388881	0.22179	1			1
57514	ARHGAP31	1.09629e-45	1	5.02311e-33	1	1.10009	0.437054	0	1.75246e-05	1	1.26504	1	0	5.1903e-05	1	3.86009	2.07507	1.54807	0.74603			1	1
54464	XRN1	1.60539e-14	1	6.21821e-33	1	2.76919	0.0197086	1	5.3662e-25	1	1.92374	1	0	0.00171475	1	1.56865	2.08719	0.616738	0.295487	1			1
4651	MYO10	1.06872e-07	1	7.68094e-33	1	3.39822	1	0	2.76644e-08	1	1.78346	1	0	0.0081901	1	1.4542	2.21196	1.04044	0.470369	1			1
57169	ZNFX1	2.73793e-30	1	1.04935e-32	1	2.26683	7.78963e-05	1	1.61127e-43	1	1.68556	0.052342	0	2.18712e-06	1	1.80703	1.91981	0.306607	0.159707	1			1
65979	PHACTR4	1.83533e-31	1	1.2067e-32	1	2.19205	0.00490188	1	7.81888e-22	1	1.58386	1	0	0.000585065	1	1.62943	1.80178	0.338753	0.18801	1			1
6925	TCF4	1.41406e-05	1	2.62992e-32	1	3.65553	1	0	2.59456e-15	1	2.52802	0.199143	0	0.00529411	1	1.17756	2.4537	1.24065	0.505625	1	1		2
23764	MAFF	0.00092651	1	1.76668e-30	1	5.464	0.0137733	1	2.76503e-05	1	0.464724	7.44405e-06	1	0.00208653	1	0.798223	2.24232	2.79504	1.2465	1			1
330	BIRC3	6.39533e-41	1	5.89627e-30	1	2.02885	0.0162438	1	5.35091e-12	1	0.712044	7.35748e-07	1	7.37649e-05	1	1.4714	1.4041	0.660979	0.470749	1			1
3097	HIVEP2	5.26739e-45	1	1.26036e-28	1	4.99955	0.0799241	0	8.21717e-32	1	3.96569	0.0114933	1	0.0338518	1	1.29144	3.41889	1.91358	0.559706	1	1		2
3624	INHBA	1	0	1.77434e-28	1	31.5895	0.821378	0	2.06263e-51	1	21.0106	0.00163013	1	1.87961e-12	1	4.05211	18.8841	13.8913	0.735611	1	1	1	3
3965	LGALS9	1.92231e-55	1	1.16191e-26	1	1.58908	7.09551e-05	1	2.72093e-28	1	1.43603	0.0113582	1	3.39202e-10	1	2.02035	1.68182	0.302997	0.18016			1	1
NA	FCGR1B	0.048738	1	1.18165e-26	1	3.51258	0.000498208	1	4.98569e-63	1	2.54209	2.33792e-13	1	5.2729e-14	1	1.57628	2.54365	0.968153	0.380615	1	1		2
390	RND3	1.73082e-06	1	1.42e-26	1	3.36593	0.0514369	0	3.254e-11	1	1.6117	1.95375e-06	1	2.62882e-05	1	1.38228	2.11997	1.08511	0.511853	1			1
4814	NINJ1	5.70404e-17	1	2.76414e-26	1	2.33268	0.134846	0	8.92825e-18	1	2.20052	0.000220573	1	0.000581682	1	0.986713	1.83997	0.741891	0.403208	1	1		2
6352	CCL5	5.70404e-17	1	4.21948e-26	1	2.26038	0.000624496	1	5.38644e-24	1	1.53357	1.38393e-09	1	7.65578e-13	1	1.57602	1.78999	0.407922	0.227891	1			1
51422	PRKAG2	2.60349e-08	1	5.70601e-26	1	2.56933	0.577687	0	1.35531e-11	1	2.10764	0.793245	0	0.00780919	1	1.41774	2.03157	0.579552	0.285273	1	1		2
719	C3AR1	2.84124e-42	1	3.71296e-25	1	1.1542	0.00114636	1	6.62644e-63	1	4.24894	9.02262e-12	1	5.48209e-07	1	0.80391	2.06902	1.89598	0.916366		1		1
558	AXL	1.51562e-22	1	4.87229e-25	1	2.64101	1	0	8.76608e-26	1	13.4116	1	0	0.00892776	1	1.79165	5.94808	6.47752	1.08901	1	1		2
81622	UNC93B1	1.76406e-12	1	3.72154e-24	1	2.39431	0.0229477	1	1.156e-20	1	1.8892	0.718846	0	0.000609973	1	1.39651	1.89334	0.498912	0.263508	1			1
415116	PIM3	2.66427e-61	1	4.64966e-24	1	1.42824	0.0117486	1	5.37359e-50	1	2.28735	3.74115e-10	1	0.00611126	1	0.911121	1.54224	0.695158	0.450746		1		1
93349	SP140L	3.22267e-10	1	4.97229e-24	1	2.43963	0.0013649	1	2.27919e-25	1	1.50838	1	0	0.047893	1	1.4435	1.79717	0.557334	0.310117	1			1
NA	AL445490.1	0.000213714	1	9.38901e-24	1	3.1437	0.00893869	1	4.20491e-17	1	0.135944	0.00108441	1	1.65896e-06	1	1.71104	1.66356	1.50444	0.904349	1			1
10859	LILRB1	2.63685e-10	1	2.01627e-22	1	2.24582	0.209002	0	3.11546e-17	1	1.89135	0.572908	0	0.00517843	1	1.36143	1.83287	0.445087	0.242837	1			1
57194	ATP10A	6.56894e-07	1	3.35243e-22	1	2.88006	0.312454	0	2.9835e-21	1	3.09173	1	0	0.0135432	1	1.58842	2.52007	0.813743	0.322904	1	1		2
340152	ZC3H12D	0.00124061	1	6.15752e-22	1	3.24688	0.9967	0	0.000788736	1	1.49178	0.559652	0	0.00835295	1	1.18717	1.97527	1.11172	0.562819	1			1
9111	NMI	1.64066e-08	1	6.70789e-22	1	2.39363	0.00833084	1	7.22951e-08	1	1.19707	1	0	0.024689	1	1.39672	1.66247	0.641019	0.385582	1			1
1839	HBEGF	1.0464e-16	1	7.53279e-22	1	2.08479	0.000277858	1	4.45141e-26	1	0.920071	6.45162e-19	1	2.45313e-05	1	0.612063	1.20564	0.776782	0.64429	1			1
9603	NFE2L3	3.51175e-18	1	1.18748e-21	1	2.36579	0.000275931	1	7.2141e-30	1	1.58771	1.32477e-23	1	2.92629e-10	1	0.316697	1.4234	1.03438	0.726698	1			1
3660	IRF2	1.3618e-08	1	7.15879e-21	1	2.26278	0.0193848	1	7.91766e-18	1	1.64728	0.590167	0	0.0243369	1	1.18157	1.69721	0.542334	0.319545	1			1
5393	EXOSC9	2.99258e-13	1	8.15501e-21	1	2.11745	0.0442348	1	2.45783e-10	1	1.46582	0.603	0	0.0225628	1	1.19123	1.5915	0.475727	0.298918	1			1
197259	MLKL	9.85998e-09	1	1.56565e-20	1	2.17275	0.057122	0	2.66194e-21	1	1.87849	1	0	0.0323701	1	1.65757	1.90294	0.258461	0.135822	1			1
79145	CHCHD7	1.09422e-15	1	4.41786e-20	1	2.0021	0.0244356	1	2.57872e-18	1	1.78032	0.000185786	1	0.000316034	1	1.18761	1.65667	0.421086	0.254176	1			1
5743	PTGS2	4.65747e-13	1	1.23039e-19	1	1.90173	0.324851	0	4.0766e-06	1	2.5402	0.274323	0	4.91155e-05	1	3.46582	2.63592	0.786422	0.298349		1	1	2
9021	SOCS3	3.7105e-93	1	1.50121e-19	1	0.677734	0.940169	0	5.73863e-52	1	6.62564	4.61786e-06	1	0.000170531	1	1.66995	2.99111	3.18645	1.06531		1		1
2180	ACSL1	5.83161e-41	1	1.60001e-19	1	1.32998	0.0495283	1	5.01079e-50	1	3.01742	4.08749e-17	1	7.17932e-05	1	0.908142	1.75185	1.11613	0.637116		1		1
23328	SASH1	0.055198	0	6.71671e-19	1	2.70587	0.00318345	1	1.75777e-14	1	1.21866	5.57905e-09	1	6.3942e-07	1	1.00087	1.6418	0.927925	0.565187	1			1
10581	IFITM2	2.11728e-10	1	9.52896e-19	1	2.06898	0.0172513	1	5.09592e-13	1	1.43488	1	0	0.00017295	1	1.98616	1.83001	0.344689	0.188354	1			1
1588	CYP19A1	0.136977	0	1.19112e-18	1	7.59669	1	0	4.2803e-26	1	9.31285	0.00198061	1	5.78993e-08	1	1.36173	6.09042	4.1841	0.686997	1	1		2
116496	NIBAN1	1.0488e-06	1	1.35884e-18	1	2.27436	1	0	1.25769e-13	1	2.33444	3.39912e-05	1	9.55024e-09	1	1.33739	1.98206	0.559112	0.282086	1	1		2
5292	PIM1	2.05893e-103	1	4.2981e-18	1	0.472489	1	0	6.13853e-91	1	9.35286	4.78331e-16	1	0.000685612	1	0.769967	3.53177	5.0434	1.42801		1		1
604	BCL6	3.70741e-21	1	7.10451e-18	1	1.3796	0.371014	0	2.78813e-20	1	2.82541	2.54989e-05	1	3.01525e-08	1	1.3216	1.84221	0.851976	0.462476		1		1
55603	TENT5A	2.01627e-27	1	9.71039e-18	1	1.59009	0.0846737	0	3.48925e-22	1	2.14584	1	0	0.0249148	1	1.96165	1.89919	0.28309	0.149058		1		1
55802	DCP1A	5.59464e-09	1	9.99897e-18	1	2.04411	0.0102225	1	2.39628e-09	1	1.28852	0.165737	0	0.00111271	1	1.2665	1.53304	0.442735	0.288795	1			1
84335	AKT1S1	2.09833e-05	1	1.10988e-17	1	2.43128	1	0	7.26234e-07	1	2.0613	0.843878	0	0.0352576	1	1.20217	1.89825	0.630566	0.332183	1	1		2
4067	LYN	5.75212e-10	1	4.27892e-17	1	2.01029	0.00162046	1	2.40427e-21	1	1.56436	1.68797e-09	1	3.88352e-07	1	1.06202	1.54556	0.474417	0.306955	1			1
24145	PANX1	2.02572e-12	1	4.74758e-17	1	1.85585	0.773739	0	3.15418e-09	1	2.06938	0.609112	0	0.0339216	1	1.15824	1.69449	0.476523	0.28122		1		1
6355	CCL8	0.590531	0	1.00085e-16	1	15.9361	1	0	4.64016e-11	1	9.25553	1	0	0.000114876	1	5.8457	10.3458	5.13279	0.496124	1	1	1	3
684	BST2	2.04211e-54	1	2.27974e-16	1	1.10762	0.0425685	1	1.75562e-39	1	2.45446	0.000723752	1	3.50389e-05	1	1.29635	1.61947	0.729246	0.450298		1		1
6774	STAT3	0.00563292	1	5.5012e-16	1	2.36187	0.000118041	1	2.50919e-22	1	1.21352	3.22106e-06	1	2.36782e-06	1	1.26602	1.6138	0.648372	0.401766	1			1
3959	LGALS3BP	0.00436928	1	3.9172e-15	1	2.71079	1	0	2.48467e-12	1	4.24833	1	0	8.73924e-05	1	3.70072	3.55328	0.779305	0.21932	1	1	1	3
1848	DUSP6	8.49162e-77	1	4.81788e-15	1	0.910043	0.421327	0	1.12727e-27	1	2.7678	0.259363	0	0.00597961	1	1.51666	1.7315	0.947327	0.547114		1		1
79651	RHBDF2	1.99939e-12	1	2.36102e-14	1	1.66637	0.132087	0	5.6438e-18	1	2.02301	0.000633547	1	1.41252e-06	1	1.24946	1.64628	0.387167	0.235177		1		1
6515	SLC2A3	0.114485	0	3.54223e-14	1	2.94332	0.0347561	1	2.0617e-13	1	1.22894	5.66643e-09	1	2.94931e-11	1	1.38542	1.85256	0.947861	0.511649	1			1
7318	UBA7	4.90183e-08	1	2.29669e-13	1	1.77522	0.0085862	1	1.54281e-26	1	2.00488	1	0	0.000226525	1	2.00053	1.92688	0.13136	0.0681725		1	1	2
4049	LTA	0.00139332	1	5.0303e-12	1	2.23258	0.0107696	1	7.4945e-07	1	0.0311442	0.000197743	1	2.02919e-07	1	1.16212	1.14195	1.10085	0.964014	1			1
283635	FAM177A1	0.00350535	1	9.86545e-12	1	2.00945	0.291369	0	0.00155234	1	1.25215	0.0172703	1	0.0459979	1	0.955914	1.40584	0.543325	0.386477	1			1
23052	ENDOD1	0.122642	0	1.93444e-11	1	2.58749	0.551837	0	4.39275e-13	1	2.23295	1	0	0.0109398	1	1.53132	2.11725	0.537505	0.253869	1	1		2
53826	FXYD6	0.0328784	1	4.52668e-11	1	2.04333	0.0560752	0	0.000260578	1	0.856469	0.000640025	1	5.65484e-07	1	1.95327	1.61769	0.660772	0.408467	1			1
342510	CD300E	0.00150274	1	3.22077e-10	1	0.377049	0.98172	0	0.000207684	1	1.32801	0.690573	0	9.78219e-05	1	3.32264	1.6759	1.5033	0.897009			1	1
55509	BATF3	0.101854	0	8.21945e-10	1	2.1333	0.0404221	1	2.53707e-09	1	1.38102	0.000214964	1	0.00171306	1	1.00173	1.50535	0.575937	0.382594	1			1
661	POLR3D	1	0	1.58407e-09	1	2.31618	0.00717415	1	6.06774e-07	1	1.15324	1	0	0.000865132	1	1.4921	1.65384	0.598104	0.361646	1			1
6507	SLC1A3	0.000147178	1	2.54623e-09	1	1.66226	0.300206	0	9.44545e-20	1	2.59568	0.0261393	1	7.58636e-06	1	1.39995	1.88596	0.628473	0.333237		1		1
5724	PTAFR	1.00116e-25	1	1.30931e-08	1	0.549256	0.434393	0	2.82053e-08	1	2.44797	0.510221	0	0.000259876	1	1.82951	1.60891	0.968389	0.601891		1		1
23258	DENND5A	1.20441e-20	1	1.48422e-08	1	1.03447	0.155397	0	5.85589e-19	1	2.067	0.0130224	1	0.00151612	1	1.14644	1.41597	0.566582	0.400137		1		1
NA	LINC02611	0.0477208	1	1.60648e-08	1	1.80239	1	0	1.24848e-23	1	4.27426	3.89131e-08	1	1.25601e-08	1	1.10977	2.39547	1.66353	0.694445		1		1
60485	SAV1	0.880432	0	2.01865e-08	1	2.26949	0.153528	0	5.36426e-05	1	1.17347	0.677629	0	0.000541586	1	1.47944	1.6408	0.565547	0.344678	1			1
92745	SLC38A5	1	0	2.36167e-08	1	2.25758	0.0180626	1	0.00165515	1	1.01142	1	0	0.0479487	1	1.34929	1.53943	0.644472	0.418643	1			1
9332	CD163	0.428698	0	2.68656e-08	1	1.8108	1	0	0.0194497	1	41.5373	1	0	0.00304284	1	3.46837	15.6055	22.4729	1.44006		1	1	2
6238	RRBP1	1	0	2.835e-08	1	2.24836	0.0295767	1	0.00308484	1	0.994419	1	0	0.00397401	1	1.483	1.57526	0.63204	0.40123	1			1
5739	PTGIR	0.00282852	1	3.19325e-08	1	1.56729	0.284459	0	8.21096e-11	1	1.48242	1	0	0.000120119	1	2.96829	2.006	0.834446	0.415976			1	1
2131	EXT1	3.44877e-06	1	5.86062e-08	1	1.28491	0.493551	0	1.66831e-08	1	1.9652	0.0519824	0	2.87307e-05	1	2.01069	1.7536	0.406534	0.231828			1	1
2209	FCGR1A	1	0	1.81388e-07	1	2.24712	0.00114112	1	4.4265e-30	1	1.7817	2.52642e-05	1	6.86909e-08	1	1.33412	1.78765	0.45653	0.25538	1			1
9435	CHST2	1.9049e-82	1	3.79986e-06	1	0.262184	0.000718498	1	8.27518e-68	1	2.64495	2.34594e-24	1	1.12292e-07	1	0.617689	1.17494	1.28541	1.09402		1		1
4502	MT2A	0.000510752	1	5.02785e-06	1	1.47271	0.079298	0	4.05949e-41	1	3.15209	0.15886	0	8.35765e-05	1	1.59485	2.07322	0.936322	0.451628		1		1
1291	COL6A1	4.85128e-15	1	1.8436e-05	1	1.03908	1	0	0.0459398	1	1.38355	1	0	0.000191791	1	2.78168	1.73477	0.922863	0.53198			1	1
NA	AC010624.5	1	0	1.91719e-05	1	4.26416	0.140965	0	0.00307554	1	1.19619	1	0	0.00164416	1	2.43954	2.6333	1.54314	0.58601	1		1	2
2296	FOXC1	1	0	2.19261e-05	1	2.75722	0.637817	0	0.00509905	1	1.28519	1	0	0.0306563	1	1.53462	1.85901	0.787807	0.423778	1			1
1545	CYP1B1	1	0	2.83968e-05	1	2.12397	0.101456	0	4.95089e-05	1	1.4026	1.20989e-07	1	0.000394437	1	0.893835	1.47347	0.618122	0.419502	1			1
7850	IL1R2	0.000488962	1	3.38444e-05	1	0.418431	0.0156414	1	5.19369e-12	1	6.68047	0.000657566	1	0.000364383	1	0.410504	2.50313	3.61768	1.44526		1		1
3290	HSD11B1	0.880242	0	3.82052e-05	1	4.61397	1	0	7.91766e-18	1	5.71943	0.0012874	1	4.30181e-05	1	1.05464	3.79601	2.43759	0.642145	1	1		2
10602	CDC42EP3	2.54332e-07	1	0.000192714	1	1.24633	0.0732231	0	8.23397e-36	1	2.77856	0.0062292	1	0.000643925	1	1.32364	1.78284	0.863179	0.484159		1		1
64005	MYO1G	1	0	0.000266926	1	2.01894	0.611127	0	3.46283e-06	1	1.58926	1.00038e-06	1	0.00138122	1	0.952123	1.52011	0.536759	0.353106	1			1
6999	TDO2	1	0	0.000759833	1	33.3775	0.360351	0	9.88884e-17	1	0.927942	1.05165e-06	1	6.46207e-14	1	0.475803	11.5938	18.8667	1.62731	1			1
266727	MDGA1	1	0	0.00222101	1	2.52815	1	0	0.000361025	1	2.32097	0.650146	0	1.1835e-07	1	1.28292	2.04402	0.667218	0.326425	1	1		2
10148	EBI3	7.49956e-08	1	0.00831711	1	0.4439	1	0	0.000522236	1	4.37674	0.0156116	1	9.41491e-05	1	1.69937	2.17334	2.00881	0.924295		1		1
10211	FLOT1	5.6257e-05	1	0.00965293	1	1.01267	0.00187935	1	1.79003e-14	1	2.07408	1.66863e-13	1	0.000594093	1	0.847828	1.31153	0.665516	0.507436		1		1
6357	CCL13	0.568795	0	0.0296677	1	2.42094	1	0	0.00516517	1	57.749	1	0	1.37303e-05	1	58.6926	39.6208	32.2195	0.813196	1	1	1	3
54567	DLL4	0.0117712	1	0.035295	1	2.81581	0.196263	0	0.000281482	1	0.935273	0.51176	0	0.0227252	1	1.14005	1.63038	1.03171	0.632801	1			1
9518	GDF15	0.285175	0	0.0353401	1	2.27796	0.300632	0	0.000156194	1	1.29364	3.64015e-06	1	2.75017e-09	1	1.56575	1.71245	0.508291	0.296821	1			1
9242	MSC	1.03645e-35	1	0.0391432	1	0.310903	1	0	3.08254e-12	1	11.916	0.846064	0	0.00017514	1	29.622	13.9496	14.761	1.05816		1	1	2
