# Supplementary material for: Loss of the Immunomodulatory Transcription Factor BATF2 in Humans Is Associated with a Neurological Phenotype
Source: Cells. 2023 Jan 5;12(2):227. doi: 10.3390/cells12020227 (PMC9856319; doi:10.3390/cells12020227)
Supplement: Supplementary file 1 [file cells-12-00227-s001.zip › File S3.xlsx]

## Sheet: Tabelle1
Analysis Type:		PANTHER Overrepresentation Test (Released 20221013)
Annotation Version and Release Date:		GO Ontology database DOI: 10.5281/zenodo.6799722 Released 2022-07-01
Analyzed List:		upload_1 (Homo sapiens)
Reference List:		Homo sapiens (all genes in database)
Test Type:		FISHER
Correction:		FDR
GO biological process complete		Homo sapiens - REFLIST (20589)	upload_1 (81)	upload_1 (expected)	upload_1 (over/under)	upload_1 (fold Enrichment)	upload_1 (raw P-value)	upload_1 (FDR)	logP	Genes
negative regulation of viral genome replication	GO:0045071	57	7	0.22	+	31.22	5.65e-09	2.53e-06	8.24795	IFIT5/IFIT1/RSAD2/ISG20/ISG15/IFIH1/IFITM3
ISG15-protein conjugation	GO:0032020	6	4	0.02	+	> 100	4.51e-08	1.65e-05	7.34582	UBA7/HERC5/ISG15/UBE2L6
response to interferon-alpha	GO:0035455	23	5	0.09	+	55.26	7.47e-08	2.49e-05	7.12668	AXL/IFIT2/MX2/IFITM3/IFIT3
negative regulation of leukocyte chemotaxis	GO:0002689	20	4	0.08	+	50.84	2.19e-06	0.000471	5.65956	TNFAIP6/CCL2/STAP1/CYP19A1
defense response to protozoan	GO:0042832	26	4	0.1	+	39.11	5.55e-06	0.00102	5.25571	IL12B/GBP4/GBP2/BATF2
response to protozoan	GO:0001562	27	4	0.11	+	37.66	6.35e-06	0.00116	5.19723	IL12B/GBP4/GBP2/BATF2
cellular response to interferon-alpha	GO:0035457	12	3	0.05	+	63.55	2.55e-05	0.00384	4.59346	AXL/IFIT2/IFIT3
negative regulation of type I interferon-mediated signaling pathway	GO:0060339	19	3	0.07	+	40.13	8.46e-05	0.0099	4.07263	STAT2/USP18/ISG15
DNA damage response, signal transduction by p53 class mediator	GO:0006977	20	3	0.08	+	38.13	9.7e-05	0.0111	4.01323	CDKN1A/PML/MUC1
negative regulation of viral entry into host cell	GO:0046597	24	3	0.09	+	31.77	0.000158	0.0169	3.80134	IFITM3/TRIM5/LY6E
